# Supplementary material for: Plasma Oxidative Status in Preterm Infants Receiving LCPUFA Supplementation: A Pilot Study
Source: PubMed Central journal article supplement (PMC7019959; doi:10.3390/nu12010122), 2020-01-01
Supplement: nutrients-12-00122-s001.pdf [file nutrients-12-00122-s001.pdf]

**Table S1.** Long-chain polyunsaturated fatty acids at birth according to infant sex.

|                                               | <b>Male (n = 8)</b> | <b>Female (n = 13)</b> | <b>p-value</b> |
|-----------------------------------------------|---------------------|------------------------|----------------|
| <b>Long-chain polyunsaturated fatty acids</b> |                     |                        |                |
| Linoleic acid (nmol/ml)                       | 1395.6 (1617)       | 850.8 (566)            | 0.624          |
| Dihomo- $\gamma$ -linolenic acid (nmol/ml)    | 137.9 (71.5)        | 104.9 (38.6)           | 0.135          |
| Arachidonic acid (nmol/ml)                    | 659.2 (324.8)       | 516.4 (239.4)          | 0.181          |
| $\alpha$ -linolenic acid (nmol/ml)            | 69.0 (141.3)        | 24.4 (42.9)            | 0.970          |
| Eicosapentaenoic acid (nmol/ml)               | 155.1 (260.0)       | 69.2 (70.0)            | 0.851          |
| Docosahexaenoic acid (nmol/ml)                | 268.1 (306.3)       | 221.9 (91.5)           | 0.624          |
| <b>Antioxidants</b>                           |                     |                        |                |
| Catalase activity (U cata/mg protein)         | 4.4 (1.8)           | 3.4 (3.0)              | 0.860          |
| Thiol groups (mM GSH/mg protein)              | 0.01 (0.0)          | 0.01 (0.0)             | 0.697          |
| Reduced glutathione (mg GSH/mg protein)       | 0.2 (0.2)           | 0.2 (0.1)              | 0.595          |
| Antiox-S (arbitrary units)                    | 0.1 (0.6)           | -0.1 (1.5)             | 0.595          |
| <b>Biomarkers of oxidative damage</b>         |                     |                        |                |
| Malondialdehyde ( $\mu$ mol/ml)               | 6.0 (2.8)           | 4.6 (2.2)              | 0.145          |
| Total carbonyl proteins (nmol/mg protein)     | 0.4 (0.3)           | 0.3 (0.3)              | 0.268          |
| Oxy-S (arbitrary units)                       | -0.6 (0.7)          | 0.03 (1.0)             | 0.213          |

Data show medians (IQR). Mann-Whitney U test.

**Table S2.** Increases in anthropometric parameters and growth velocities from birth to end of supplementation.

|                                     | <b>MCT-S (n = 12)</b> | <b>ARA:DHA-S (n = 10)</b> | <b>p-value</b> |
|-------------------------------------|-----------------------|---------------------------|----------------|
| $\Delta$ Weight (g)                 | (509.8)               | 965.0 (491.5)             | 0.445          |
| $\Delta$ Weight z-score             | -1.53 (0.36)          | -1.40 (0.44)              | 0.428          |
| $\Delta$ Length (cm)                | (1.7)                 | 6.5 (4.2)                 | 0.547          |
| $\Delta$ Length z-score             | -1.43 (4.27)          | -1.37 (1.08)              | 0.420          |
| $\Delta$ Head circumference (cm)    | 6.1 (2.2)             | 6.0 (3.7)                 | 0.690          |
| $\Delta$ Head circumference z-score | -0.72 (1.01)          | -1.23 (0.63)              | 0.421          |
| Weight gain (g/kg/day)              | 4.47)                 | 10.43 (4.19)              | 0.792          |
| Length gain (cm/day)                | 0.04)                 | 0.14 (0.10)               | 0.222          |
| Head circumference gain (cm/day)    | 0.09 (0.05)           | 0.11 (0.04)               | 0.548          |

Data show medians (IQR). Change ( $\Delta$ ). Mann-Whitney U test.
